# Supplementary material for: MicroRNA-199a and -214 as potential therapeutic targets in pancreatic stellate cells in pancreatic tumor
Source: PubMed Central journal article supplement (PMC4941323; doi:10.18632/oncotarget.7651), 2016-02-24
Supplement: oncotarget-07-16396-s001.pdf [file oncotarget-07-16396-s001.pdf]

## MicroRNA-199a and -214 as potential therapeutic targets in pancreatic stellate cells in pancreatic tumor

### Supplementary Materials

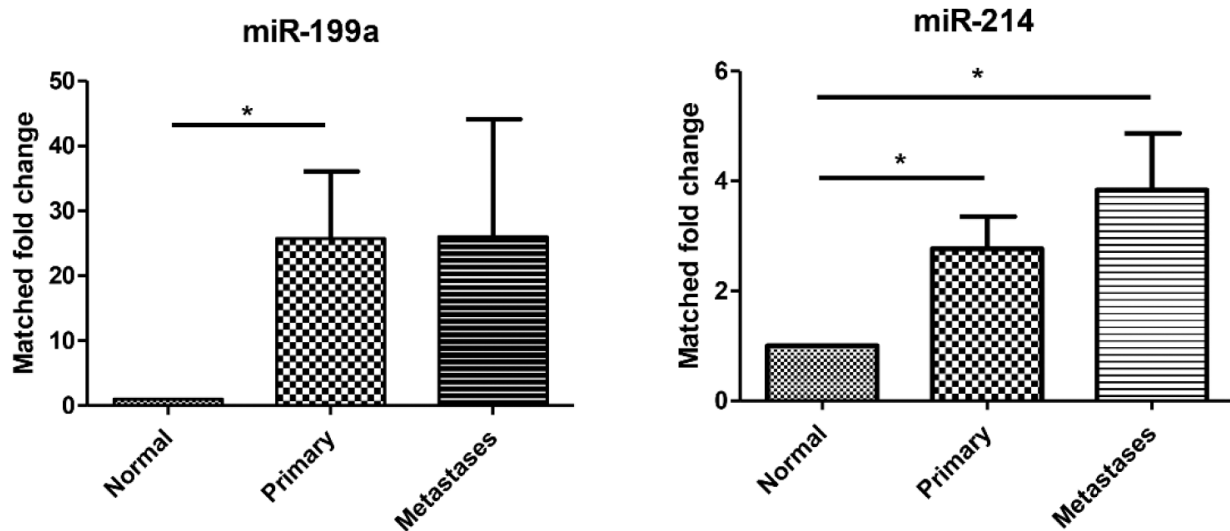

Supplementary Figure S1: Data showing miRNA-199a and -214 expression levels in matched colorectal carcinoma tumor and liver metastasis in patients. The stromal region from non-tumor (normal), malignant tumor at the primary tumor site and the liver metastatic site was isolated using laser captured microdissection and analyzed by RT-qPCR. Data represent  $n = 8$  matched samples from patients. Mean + SEM,  $*p < 0.05$ .
